# Supplementary material for: Rupturing Aromaticity by Periphery Overcrowding
Source: Research Square preprint supplement (doi:10.21203/rs.3.rs-1347057/v1), 2022-03-08

## checkCIF/PLATON report

You have not supplied any structure factors. As a result the full set of tests cannot be run.

THIS REPORT IS FOR GUIDANCE ONLY. IF USED AS PART OF A REVIEW PROCEDURE FOR PUBLICATION, IT SHOULD NOT REPLACE THE EXPERTISE OF AN EXPERIENCED CRYSTALLOGRAPHIC REFEREE.

No syntax errors found.      CIF dictionary      Interpreting this report

### Datablock: 4\_18srv314

---

Bond precision:      C-C = 0.0099 Å      Wavelength=0.71073

Cell:                      a=11.0794 (6)              b=19.5994 (11)              c=59.837 (3)  
                            alpha=90              beta=93.9088 (15)              gamma=90

Temperature:              120 K

|                        | Calculated                            | Reported                               |
|------------------------|---------------------------------------|----------------------------------------|
| Volume                 | 12963.4 (12)                          | 12963.3 (12)                           |
| Space group            | P 21/n                                | P 1 21/n 1                             |
| Hall group             | -P 2yn                                | -P 2yn                                 |
| Moiety formula         | 3 (C49 H33), 3 (Cl6 Sb), 2 (C H2 Cl2) | Cl6 Sb 1-, 0.67 (C H2 Cl2), C49 H33 1+ |
| Sum formula            | C149 H103 Cl22 Sb3                    | C49.67 H34.33 Cl17.33 Sb               |
| Mr                     | 3038.49                               | 1012.82                                |
| Dx, g cm <sup>-3</sup> | 1.557                                 | 1.557                                  |
| Z                      | 4                                     | 12                                     |
| Mu (mm <sup>-1</sup> ) | 1.128                                 | 1.128                                  |
| F000                   | 6096.0                                | 6096.0                                 |
| F000'                  | 6103.60                               |                                        |
| h, k, lmax             | 13, 23, 71                            | 13, 23, 71                             |
| Nref                   | 22904                                 | 22893                                  |
| Tmin, Tmax             | 0.835, 0.968                          | 0.772, 0.984                           |
| Tmin'                  | 0.695                                 |                                        |

Correction method= # Reported T Limits: Tmin=0.772 Tmax=0.984  
AbsCorr = INTEGRATION

Data completeness= 1.000              Theta(max)= 25.027

R(reflections)= 0.0724 ( 18106)

wR2(reflections)=  
0.1483 ( 22893)

S = 1.197

Npar= 1566

---

The following ALERTS were generated. Each ALERT has the format

**test-name\_ALERT\_alert-type\_alert-level.**

Click on the hyperlinks for more details of the test.

---

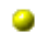

### Alert level C

|                   |                                                  |        |        |
|-------------------|--------------------------------------------------|--------|--------|
| PLAT031_ALERT_4_C | Refined Extinction Parameter Within Range .....  | 3.071  | Sigma  |
| PLAT202_ALERT_3_C | Isotropic non-H Atoms in Anion/Solvent .....     | 1      | Check  |
|                   | C51                                              |        |        |
| PLAT213_ALERT_2_C | Atom C1A has ADP max/min Ratio .....             | 3.3    | prolat |
| PLAT213_ALERT_2_C | Atom C2A has ADP max/min Ratio .....             | 3.7    | prolat |
| PLAT220_ALERT_2_C | NonSolvent Resd 3 C Ueq(max)/Ueq(min) Range      | 3.3    | Ratio  |
| PLAT243_ALERT_4_C | High 'Solvent' Ueq as Compared to Neighbors of   | C17    | Check  |
| PLAT243_ALERT_4_C | High 'Solvent' Ueq as Compared to Neighbors of   | C18    | Check  |
| PLAT244_ALERT_4_C | Low 'Solvent' Ueq as Compared to Neighbors of    | SbB    | Check  |
| PLAT244_ALERT_4_C | Low 'Solvent' Ueq as Compared to Neighbors of    | SbA    | Check  |
| PLAT244_ALERT_4_C | Low 'Solvent' Ueq as Compared to Neighbors of    | C51    | Check  |
| PLAT250_ALERT_2_C | Large U3/U1 Ratio for Average U(i,j) Tensor .... | 2.4    | Note   |
| PLAT250_ALERT_2_C | Large U3/U1 Ratio for Average U(i,j) Tensor .... | 2.1    | Note   |
| PLAT260_ALERT_2_C | Large Average Ueq of Residue Including C17       | 0.121  | Check  |
| PLAT260_ALERT_2_C | Large Average Ueq of Residue Including C19A      | 0.155  | Check  |
| PLAT336_ALERT_2_C | Long Bond Distance for ..... C51 -C19B           | 1.900  | Ang.   |
| PLAT342_ALERT_3_C | Low Bond Precision on C-C Bonds .....            | 0.0099 | Ang.   |
| PLAT410_ALERT_2_C | Short Intra H...H Contact H1A ..H12A .           | 1.98   | Ang.   |
|                   | x,y,z =                                          | 1_555  | Check  |

---

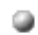

### Alert level G

FORMU01\_ALERT\_1\_G There is a discrepancy between the atom counts in the  
\_chemical\_formula\_sum and \_chemical\_formula\_moiety. This is  
usually due to the moiety formula being in the wrong format.  
Atom count from \_chemical\_formula\_sum: C49.67 H34.33 Cl7.33 Sb1  
Atom count from \_chemical\_formula\_moiety:C49.67 H34.34 Cl7.34 Sb1

CELLZ01\_ALERT\_1\_G Difference between formula and atom\_site contents detected.  
CELLZ01\_ALERT\_1\_G ALERT: check formula stoichiometry or atom site occupancies.  
From the CIF: \_cell\_formula\_units\_Z 12  
From the CIF: \_chemical\_formula\_sum C49.67 H34.33 Cl7.33 Sb  
TEST: Compare cell contents of formula and atom\_site data

| atom | Z*formula | cif sites | diff  |
|------|-----------|-----------|-------|
| C    | 596.04    | 596.00    | 0.04  |
| H    | 411.96    | 412.00    | -0.04 |
| Cl   | 87.96     | 88.00     | -0.04 |
| Sb   | 12.00     | 12.00     | 0.00  |

|                   |                                                  |        |        |
|-------------------|--------------------------------------------------|--------|--------|
| PLAT002_ALERT_2_G | Number of Distance or Angle Restraints on AtSite | 8      | Note   |
| PLAT003_ALERT_2_G | Number of Uiso or Uij Restrained non-H Atoms ... | 176    | Report |
| PLAT042_ALERT_1_G | Calc. and Reported Moiety Formula Strings Differ | Please | Check  |
| PLAT045_ALERT_1_G | Calculated and Reported Z Differ by a Factor ... | 0.3333 | Check  |
| PLAT083_ALERT_2_G | SHELXL Second Parameter in WGHT Unusually Large  | 104.12 | Why ?  |
| PLAT176_ALERT_4_G | The CIF-Embedded .res File Contains SADI Records | 2      | Report |
| PLAT187_ALERT_4_G | The CIF-Embedded .res File Contains RIGU Records | 1      | Report |
| PLAT300_ALERT_4_G | Atom Site Occupancy of C50A Constrained at       | 0.5    | Check  |
| PLAT300_ALERT_4_G | Atom Site Occupancy of C50B Constrained at       | 0.5    | Check  |
| PLAT300_ALERT_4_G | Atom Site Occupancy of H50A Constrained at       | 0.5    | Check  |
| PLAT300_ALERT_4_G | Atom Site Occupancy of H50B Constrained at       | 0.5    | Check  |
| PLAT300_ALERT_4_G | Atom Site Occupancy of H50C Constrained at       | 0.5    | Check  |

|                   |                                                  |                |       |        |
|-------------------|--------------------------------------------------|----------------|-------|--------|
| PLAT300_ALERT_4_G | Atom Site Occupancy of H50D                      | Constrained at | 0.5   | Check  |
| PLAT300_ALERT_4_G | Atom Site Occupancy of C19A                      | Constrained at | 0.5   | Check  |
| PLAT300_ALERT_4_G | Atom Site Occupancy of C19B                      | Constrained at | 0.5   | Check  |
| PLAT300_ALERT_4_G | Atom Site Occupancy of H51A                      | Constrained at | 0.5   | Check  |
| PLAT300_ALERT_4_G | Atom Site Occupancy of H51B                      | Constrained at | 0.5   | Check  |
| PLAT300_ALERT_4_G | Atom Site Occupancy of H51C                      | Constrained at | 0.5   | Check  |
| PLAT300_ALERT_4_G | Atom Site Occupancy of H51D                      | Constrained at | 0.5   | Check  |
| PLAT302_ALERT_4_G | Anion/Solvent/Minor-Residue Disorder (Resd 7 )   |                | 33%   | Note   |
| PLAT302_ALERT_4_G | Anion/Solvent/Minor-Residue Disorder (Resd 8 )   |                | 33%   | Note   |
| PLAT333_ALERT_2_G | Large Aver C6-Ring C-C Dist C5A -C14A .          |                | 1.43  | Ang.   |
| PLAT432_ALERT_2_G | Short Inter X...Y Contact C19B ..C34B            |                | 3.22  | Ang.   |
|                   | 1/2-x,-1/2+y,1/2-z =                             | 2_545          | Check |        |
| PLAT432_ALERT_2_G | Short Inter X...Y Contact C19B ..C41B            |                | 3.25  | Ang.   |
|                   | x,y,z =                                          | 1_555          | Check |        |
| PLAT434_ALERT_2_G | Short Inter HL..HL Contact C12B ..C19A           |                | 2.99  | Ang.   |
|                   | x,y,z =                                          | 1_555          | Check |        |
| PLAT434_ALERT_2_G | Short Inter HL..HL Contact C12B ..C19B           |                | 3.23  | Ang.   |
|                   | x,y,z =                                          | 1_555          | Check |        |
| PLAT720_ALERT_4_G | Number of Unusual/Non-Standard Labels .....      |                | 6     | Note   |
| PLAT793_ALERT_4_G | Model has Chirality at C16A (Centro SPGR)        |                | S     | Verify |
| PLAT793_ALERT_4_G | Model has Chirality at C16B (Centro SPGR)        |                | R     | Verify |
| PLAT793_ALERT_4_G | Model has Chirality at C16C (Centro SPGR)        |                | R     | Verify |
| PLAT793_ALERT_4_G | Model has Chirality at C17A (Centro SPGR)        |                | S     | Verify |
| PLAT793_ALERT_4_G | Model has Chirality at C17B (Centro SPGR)        |                | R     | Verify |
| PLAT793_ALERT_4_G | Model has Chirality at C17C (Centro SPGR)        |                | R     | Verify |
| PLAT794_ALERT_5_G | Tentative Bond Valency for SbC (V) .             |                | 5.03  | Info   |
| PLAT794_ALERT_5_G | Tentative Bond Valency for SbB (V) .             |                | 5.04  | Info   |
| PLAT794_ALERT_5_G | Tentative Bond Valency for SbA (V) .             |                | 5.07  | Info   |
| PLAT860_ALERT_3_G | Number of Least-Squares Restraints .....         |                | 1467  | Note   |
| PLAT933_ALERT_2_G | Number of HKL-OMIT Records in Embedded .res File |                | 4     | Note   |

- 
- 0 **ALERT level A** = Most likely a serious problem - resolve or explain  
 0 **ALERT level B** = A potentially serious problem, consider carefully  
 17 **ALERT level C** = Check. Ensure it is not caused by an omission or oversight  
 41 **ALERT level G** = General information/check it is not something unexpected
- 5 ALERT type 1 CIF construction/syntax error, inconsistent or missing data  
 18 ALERT type 2 Indicator that the structure model may be wrong or deficient  
 3 ALERT type 3 Indicator that the structure quality may be low  
 29 ALERT type 4 Improvement, methodology, query or suggestion  
 3 ALERT type 5 Informative message, check
-

It is advisable to attempt to resolve as many as possible of the alerts in all categories. Often the minor alerts point to easily fixed oversights, errors and omissions in your CIF or refinement strategy, so attention to these fine details can be worthwhile. In order to resolve some of the more serious problems it may be necessary to carry out additional measurements or structure refinements. However, the purpose of your study may justify the reported deviations and the more serious of these should normally be commented upon in the discussion or experimental section of a paper or in the "special\_details" fields of the CIF. checkCIF was carefully designed to identify outliers and unusual parameters, but every test has its limitations and alerts that are not important in a particular case may appear. Conversely, the absence of alerts does not guarantee there are no aspects of the results needing attention. It is up to the individual to critically assess their own results and, if necessary, seek expert advice.

### **Publication of your CIF in IUCr journals**

A basic structural check has been run on your CIF. These basic checks will be run on all CIFs submitted for publication in IUCr journals (*Acta Crystallographica*, *Journal of Applied Crystallography*, *Journal of Synchrotron Radiation*); however, if you intend to submit to *Acta Crystallographica Section C* or *E* or *IUCrData*, you should make sure that full publication checks are run on the final version of your CIF prior to submission.

### **Publication of your CIF in other journals**

Please refer to the *Notes for Authors* of the relevant journal for any special instructions relating to CIF submission.

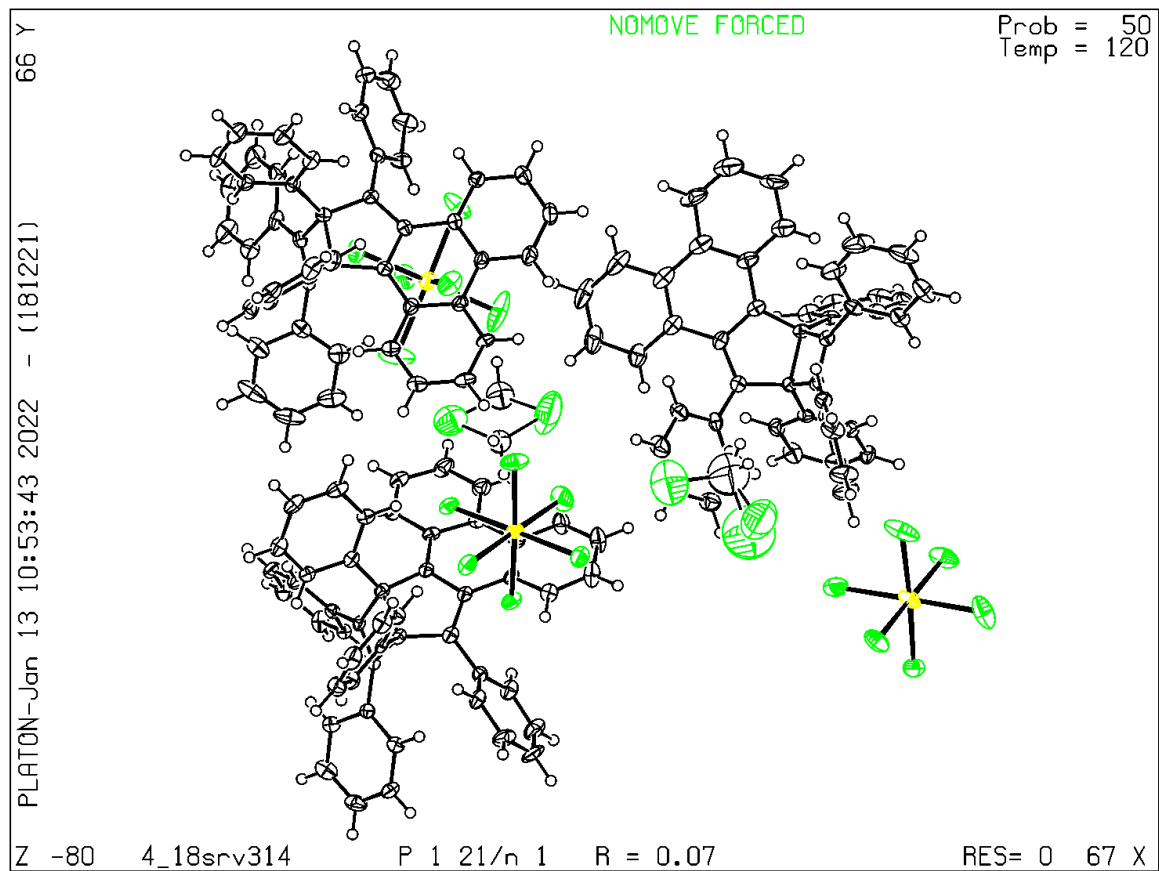

Supplement: Supplementary file 5 [file 8e0ca4057e0d840f92c6fd4d.pdf]
