# Supplementary material for: Rupturing Aromaticity by Periphery Overcrowding
Source: Research Square preprint supplement (doi:10.21203/rs.3.rs-1347057/v1), 2022-03-08

---

The following ALERTS were generated. Each ALERT has the format

**test-name\_ALERT\_alert-type\_alert-level.**

Click on the hyperlinks for more details of the test.

---

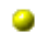

#### Alert level C

|                   |                                                  |         |        |
|-------------------|--------------------------------------------------|---------|--------|
| PLAT084_ALERT_3_C | High wR2 Value (i.e. > 0.25) .....               | 0.27    | Report |
| PLAT220_ALERT_2_C | NonSolvent Resd 1 C Ueq(max)/Ueq(min) Range      | 3.4     | Ratio  |
| PLAT244_ALERT_4_C | Low 'Solvent' Ueq as Compared to Neighbors of    | C1S     | Check  |
| PLAT244_ALERT_4_C | Low 'Solvent' Ueq as Compared to Neighbors of    | C2S     | Check  |
| PLAT250_ALERT_2_C | Large U3/U1 Ratio for Average U(i,j) Tensor .... | 2.1     | Note   |
| PLAT250_ALERT_2_C | Large U3/U1 Ratio for Average U(i,j) Tensor .... | 2.1     | Note   |
| PLAT250_ALERT_2_C | Large U3/U1 Ratio for Average U(i,j) Tensor .... | 2.5     | Note   |
| PLAT250_ALERT_2_C | Large U3/U1 Ratio for Average U(i,j) Tensor .... | 2.3     | Note   |
| PLAT342_ALERT_3_C | Low Bond Precision on C-C Bonds .....            | 0.01634 | Ang.   |
| PLAT601_ALERT_2_C | Unit Cell Contains Solvent Accessible VOIDS of . | 60      | Ang**3 |

---

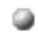

#### Alert level G

|                   |                                                  |        |              |
|-------------------|--------------------------------------------------|--------|--------------|
| PLAT003_ALERT_2_G | Number of Uiso or Uij Restrained non-H Atoms ... | 1      | Report       |
| PLAT012_ALERT_1_G | No _shelx_res_checksum Found in CIF .....        |        | Please Check |
| PLAT042_ALERT_1_G | Calc. and Reported Moiety Formula Strings Differ |        | Please Check |
| PLAT045_ALERT_1_G | Calculated and Reported Z Differ by a Factor ... | 0.5000 | Check        |
| PLAT072_ALERT_2_G | SHELXL First Parameter in WGHT Unusually Large   | 0.15   | Report       |
| PLAT083_ALERT_2_G | SHELXL Second Parameter in WGHT Unusually Large  | 41.00  | Why ?        |
| PLAT186_ALERT_4_G | The CIF-Embedded .res File Contains ISOR Records | 1      | Report       |
| PLAT434_ALERT_2_G | Short Inter HL..HL Contact C13A ..C17S           | 3.29   | Ang.         |
|                   | x,y,z =                                          | 1_555  | Check        |
| PLAT794_ALERT_5_G | Tentative Bond Valency for Sb1 (V) .             | 5.05   | Info         |
| PLAT794_ALERT_5_G | Tentative Bond Valency for Sb2 (V) .             | 5.04   | Info         |
| PLAT860_ALERT_3_G | Number of Least-Squares Restraints .....         | 6      | Note         |
| PLAT870_ALERT_4_G | ALERTS Related to Twinning Effects Suppressed .. | !      | Info         |
| PLAT933_ALERT_2_G | Number of HKL-OMIT Records in Embedded .res File | 4      | Note         |
| PLAT967_ALERT_5_G | Note: Two-Theta Cutoff Value in Embedded .res .. | 54.0   | Degree       |

---

- 0 **ALERT level A** = Most likely a serious problem - resolve or explain  
0 **ALERT level B** = A potentially serious problem, consider carefully  
10 **ALERT level C** = Check. Ensure it is not caused by an omission or oversight  
14 **ALERT level G** = General information/check it is not something unexpected

- 3 ALERT type 1 CIF construction/syntax error, inconsistent or missing data  
11 ALERT type 2 Indicator that the structure model may be wrong or deficient  
3 ALERT type 3 Indicator that the structure quality may be low  
4 ALERT type 4 Improvement, methodology, query or suggestion  
3 ALERT type 5 Informative message, check
- 
-

It is advisable to attempt to resolve as many as possible of the alerts in all categories. Often the minor alerts point to easily fixed oversights, errors and omissions in your CIF or refinement strategy, so attention to these fine details can be worthwhile. In order to resolve some of the more serious problems it may be necessary to carry out additional measurements or structure refinements. However, the purpose of your study may justify the reported deviations and the more serious of these should normally be commented upon in the discussion or experimental section of a paper or in the "special\_details" fields of the CIF. checkCIF was carefully designed to identify outliers and unusual parameters, but every test has its limitations and alerts that are not important in a particular case may appear. Conversely, the absence of alerts does not guarantee there are no aspects of the results needing attention. It is up to the individual to critically assess their own results and, if necessary, seek expert advice.

### **Publication of your CIF in IUCr journals**

A basic structural check has been run on your CIF. These basic checks will be run on all CIFs submitted for publication in IUCr journals (*Acta Crystallographica*, *Journal of Applied Crystallography*, *Journal of Synchrotron Radiation*); however, if you intend to submit to *Acta Crystallographica Section C* or *E* or *IUCrData*, you should make sure that full publication checks are run on the final version of your CIF prior to submission.

### **Publication of your CIF in other journals**

Please refer to the *Notes for Authors* of the relevant journal for any special instructions relating to CIF submission.

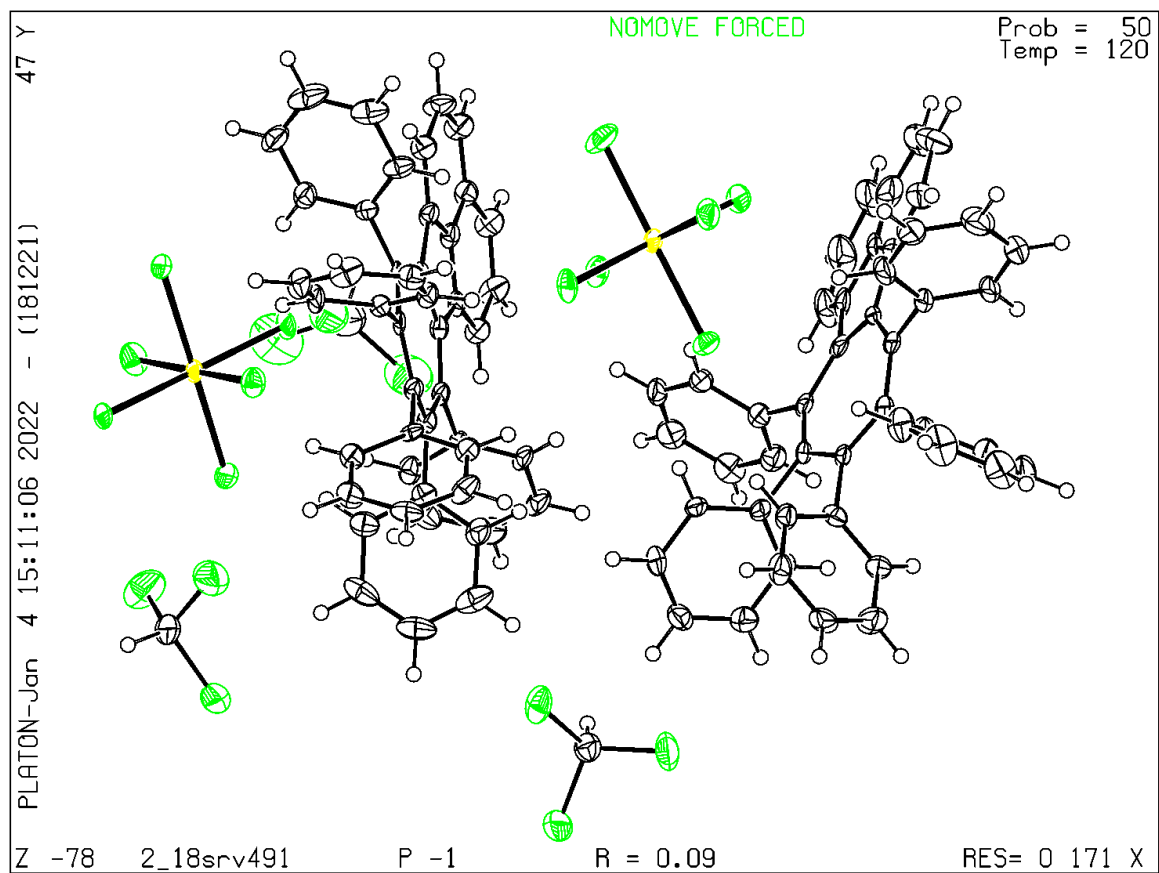

Supplement: Supplementary file 8 [file cee10034e23b585b2e1d220e.pdf]
